# Supplementary material for: Comparative Proteomic Analysis Identifies EphA2 as a Specific Cell Surface Marker for Wharton’s Jelly-Derived Mesenchymal Stem Cells
Source: PubMed Central journal article supplement (PMC7503404; doi:10.3390/ijms21176437), 2020-09-03
Supplement: ijms-21-06437-s001.pdf [file ijms-21-06437-s001.pdf]

# Comparative proteomic analysis identifies EphA2 as a specific cell surface marker for Wharton's Jelly-derived mesenchymal stem cells

Ashraf Al Madhoun <sup>1,2,\*</sup>, Sulaiman K. Marafie <sup>3</sup>, Dania Haddad <sup>2</sup>, Motasem Melhem <sup>2</sup>, Mohamed Abu-Farha <sup>3</sup>, Hamad Ali <sup>2,4</sup>, Sardar Sindhu <sup>1</sup>, Maher Atari <sup>5</sup> and Fahd Al-Mulla <sup>2</sup>

Supplementary Table 1: Antibodies used in the study.

| Antibody    | Catalogue number | Manufacturer    |
|-------------|------------------|-----------------|
| EPHA2       | AF3035           | R&D             |
| SLC25A4     | ab102032         | Abcam           |
| TALIN2      | NBP2-50322       | NOVUSBIO        |
| CLE7        | ab188326         | abcam           |
| LMF2        | NBP-159374       | NOVUSBIO        |
| CD49b       | 1233             | R&D             |
| VDAC3       | AB130561         | ABCAM           |
| SOD2        | AB16956          | ABCAM           |
| PLEC        | SAB1404217       | Sigma-Aldrich   |
| NEXILIN     | AB213628         | ABCAM           |
| <i>CDH5</i> | ab33168          | ABCAM           |
| CD49e       | <b>MAB1864</b>   | NOVUSBIO        |
| CDH2        | 14215S           | CELL SIGNALLING |
| MLCK1       | NBP1-87744       | NOVUSBIO        |
| Actin Ab-5  | 612657           | BD Pharmingen   |

Supplementary Table 2: Primers used in the study.

| Gene        | Forward primer (5'-3') | Reverse primer (5'-3')  |
|-------------|------------------------|-------------------------|
| CLE7        | CCTGCTTCAGATTCAGCGTC   | AAGCAACAGGTAAGCCCTCT    |
| PLEC3       | ACGAGATCAGCTCCCTCAAAG  | CCATCGCGGAGGTCTTCATAC   |
| IGF2BP3     | CTGCACGGGAAACCCATAGA   | CCAGCACCTCCCCTGTAAAT    |
| Talin       | ACGATGCGTGTGCGAGTCATT  | AGCCAAATCCCTTTCCTCGG    |
| LMF2-F1     | TCATCTACTTGCTGCTTTGGG  | AAGCCAGTCTCTAGCAGCAG    |
| Ncadherin   | GAAATGTCTCCTGTGGGTGC   | GGTTGTCCCTGAAGAATGCTG   |
| EphA2-F     | GTGCAGTGGATGGCGAGT     | GGCTCTCAGATGCCTCAAAC    |
| CD49e       | CCTTCTTCGGATTCTCAGTGG  | CCAAGGACAGAGGTAGACA     |
| Nexilin     | AGAGGAAGAAAAGAAGGCGTT  | CCAGTTTTCCCGGTGTAAGAAAT |
| SOD2        | GTCACCGAGGAGAAGTACCA   | TTGATATGACCACCACCATTGA  |
| CD49b       | CCCAATATGGTGGGGACCTC   | CCCACCAGAAGCTGCTGAATA   |
| VDAC3       | GGAAAGGCTGCTAAGGATGTC  | AAATTCCACTCCACTACAAGACT |
| SLC25A4     | ATCGAGAGGGTCAAACCTGCT  | CTTAGGGATTCTCACCACACA   |
| <i>CDH5</i> | ATGAGATCGTGGTGGAAAGCG  | TGTGTACTTGGTCTGGGTGA    |
| CD73        | GCCTGGGAGCTTACGATTTTG  | TAGTGCCCTGGTACTGGTCG    |
